# Supplementary material for: Recommendations for quantifying and reducing uncertainty in climate projections of species distributions
Source: PubMed Central journal article supplement (PMC9805044; doi:10.1111/gcb.16371), 2022-08-17
Supplement: GCB-28-6586-s001.pdf [file GCB-28-6586-s001.pdf]

1 **Supplementary Material**

2 **Recommendations for quantifying and reducing uncertainty in climate projections of species**  
3 **distributions**

4 Stephanie Brodie\*<sup>1,2</sup>, James A. Smith<sup>1,3</sup>, Barbara A. Muhling<sup>1,3</sup>, Isaac C. Kaplan<sup>4</sup>, Lewis A.K.  
5 Barnett<sup>5</sup>, Gemma Carroll<sup>6</sup>, Paul Fiedler<sup>3</sup>, Steven J. Bograd<sup>1,2</sup>, Elliott L. Hazen<sup>1,2</sup>, Michael G.  
6 Jacox<sup>1,2,7</sup>, Kelly S. Andrews<sup>4</sup>, Cheryl L. Barnes<sup>8</sup>, Lisa Crozier<sup>4</sup>, Jerome Fiechter<sup>1</sup>, Alexa Fredston<sup>9</sup>,  
7 Melissa A. Haltuch<sup>4</sup>, Chris J. Harvey<sup>4</sup>, Elizabeth Holmes<sup>4</sup>, Melissa A. Karp<sup>10</sup>, Owen R. Liu<sup>4</sup>,  
8 Michael J. Malick<sup>4</sup>, Mercedes Pozo Buil<sup>1,2</sup>, Kate Richerson<sup>4</sup>, Christopher N Rooper<sup>11</sup>, Jameal  
9 Samhuri<sup>4</sup>, Rachel Seary<sup>1,2</sup>, Rebecca L. Selden<sup>12</sup>, Andrew R Thompson<sup>3</sup>, Desiree Tommasi<sup>1,3</sup>, Eric  
10 J. Ward<sup>4</sup>, Rich Zabel<sup>4</sup>

11 <sup>1</sup> Institute of Marine Sciences, University of California Santa Cruz, Monterey, CA, USA

12 <sup>2</sup> Environmental Research Division, Southwest Fisheries Science Center, National Marine  
13 Fisheries Service, National Oceanic and Atmospheric Administration, Monterey, CA, USA

14 <sup>3</sup> Southwest Fisheries Science Center, National Marine Fisheries Service, National Oceanic and  
15 Atmospheric Administration, San Diego, CA, USA

16 <sup>4</sup> Northwest Fisheries Science Center, National Marine Fisheries Service, National Oceanic and  
17 Atmospheric Administration, Seattle, WA, USA

18 <sup>5</sup> Alaska Fisheries Science Center, National Marine Fisheries Service, National Oceanic and  
19 Atmospheric Administration, Seattle, WA, USA

20 <sup>6</sup> Environmental Defense Fund, Seattle, USA

21 <sup>7</sup> Physical Sciences Laboratory, Earth System Research Laboratories, National Oceanic and  
22 Atmospheric Administration, Boulder, CO, USA

23 <sup>8</sup> Cooperative Institute for Climate, Ocean, and Ecosystem Studies, University of Washington,  
24 Seattle, WA, USA

25 <sup>9</sup> Department of Ecology, Evolution, and Natural Resources, Rutgers University, New Brunswick,  
26 NJ, USA

27 <sup>10</sup> ECS Tech, *in support of*, NOAA Fisheries Office of Science & Technology, Silver Spring, MD

28 <sup>11</sup> Pacific Biological Station, Fisheries and Oceans Canada, Nanaimo, British Columbia, Canada

29 <sup>12</sup> Department of Biological Sciences, Wellesley College, Wellesley, MA, USA

30

31 \*lead and corresponding author: [sbrodie@ucsc.edu](mailto:sbrodie@ucsc.edu)

## 32 **Supplementary Material**

### 33 *Operating Models: Simulated Species Biomass*

34 Spatial biomass for three species archetypes were simulated for each year and each ESM from  
35 1985-2100. Simulations used the 'virtualspecies' R package (Leroy et al., 2016) that is  
36 specifically designed to reflect real-world properties and datasets (Meynard et al., 2019).  
37 Species simulations used a two-step process. First, habitat suitability was simulated based on  
38 environmental data and defined species' habitat preferences (Table S1). The distributions used  
39 to specify these responses were normal (e.g. SST had a domed influence on habitat suitability),  
40 or logistic (e.g. prey probability of presence had a monotonically increasing influence on habitat  
41 suitability) (Table S1). Environmental variables used to force species distributions varied among  
42 species archetypes. For the HMS archetype, habitat suitability was forced by SST, MLD, and a  
43 simulated prey species, where the prey species was forced by SST and zoo\_200. For the CPS  
44 archetype, habitat suitability was forced by SST, zoo\_50, and bathymetry. For the GFS  
45 archetype, habitat suitability was forced by bottom temperature, bottom oxygen, and  
46 bathymetry. Bathymetry was used in both CPS and GFS simulations to help additionally  
47 structure known spatial distributions, where CPS prefer inshore waters and GFS prefer slope  
48 habitats (Leeuwis et al., 2019; Stierhoff et al., 2020). The domain for the CPS and GFS  
49 archetypes was reduced to inshore waters (inshore of 126°W) to reflect these preferences.

50  
51 Second, habitat suitability was calculated and converted to species presence-absence using a  
52 logistic function. The parameters of this function are listed in Table S1, and define at what  
53 habitat suitability each species becomes present. This step used the 'generateSpFromFun'  
54 function in the 'virtualspecies' package. When species were present, biomass was estimated  
55 from a log-normal distribution, and when species were absent biomass was set to zero. Biomass  
56 at each grid cell was then multiplied by habitat suitability of that same grid cell to provide  
57 habitat-informed biomass. For CPS and GFS archetypes, an additional biomass multiplier was  
58 used to encompass population-level dynamics from 1985-2100 (Figure S1). For CPS, biomass  
59 was additionally multiplied by annual indices from a population model (Punt et al., 2016) to  
60 encompass boom-bust population dynamics that are common in CPS species in the CCS (e.g.  
61 sardine and anchovy). Further, in years when CPS biomass was below the 25% quantile ('bust'  
62 years; Fig S1), we additionally multiplied biomass by a latitudinal gradient to force a preference  
63 towards southern areas. This preference for southern waters during years of low population  
64 biomass is seen in Anchovy population dynamics (MacCall et al., 2016). For GFS, biomass was  
65 additionally multiplied by an annual index that reflected a 20-year phase shift between low and  
66 high recruitment, as seen for sablefish (an example groundfish species) (Haltuch et al., 2019).  
67 Additionally, the biomass habitat suitability multiplier was lagged by 2 years to reflect how prior  
68 habitat suitability can influence recruitment. Simulated data were generated for each grid cell  
69 (HMS = 21912 grid cells; CPS & GFC = 4012 grid cells) once per year for 116 years (1985-2100). R

70 code for the simulation is provided on github  
71 ([https://github.com/stephbrodie1/Projecting\\_SDMs](https://github.com/stephbrodie1/Projecting_SDMs)).

72

### 73 *Estimation Models: Species Distribution Models*

74 We fit a series of different SDM types and parameterization options to the simulated species  
75 biomass (Figure 1; Table S2). We used four types of SDMs: generalized linear mixed models  
76 (GLMM), generalized additive models (GAM), boosted regression trees (BRT), and multilayer  
77 perceptron (MLP) - a type of neural network model. Parameterization options included various  
78 combinations of environmental (E), spatial (S), temporal covariates (T) (Figure 1). All SDMs were  
79 delta models, where both the probability of presence (binomial with logit link) and biomass are  
80 modeled as individual components. Because biomass is skewed, we used  $\log(\text{biomass})$  as a  
81 response for the positive component of the model. All SDMs were trained on data from 1985-  
82 2010, where only 500 random samples per year were used for fitting ( $n=13\ 000$ ). Random  
83 samples assumed a perfect probability of detecting the species. Fitted SDMs were then used to  
84 predict species biomass on projected environmental data. Only 500 random samples per year  
85 were used for testing purposes ( $n=45\ 000$ ).

86

87 GAMs were fitted using the *mgcv* R package (Wood, 2017). Five separate GAMs were fitted for  
88 each species archetype, with each model parameterized differently (Table S2): environmental  
89 covariates only; spatial covariates only; both environment and spatial covariates;  
90 environmental, spatial, and temporal covariates; and environmental covariates with additional  
91 residual spatiotemporal correlation implemented with a Gaussian correlation structure from  
92 the *nlme* R package (Pinheiro et al., 2017). Environmental covariates and spatial covariates  
93 were included using a thin plate regression spline, with smoothness selected via Generalized  
94 Cross Validation (GCV) (Table S2). Spatiotemporal terms were either included as a 3-way tensor  
95 product smooth (predictions vary non-linearly in space and by year, with each year allowing for  
96 a differing spatial smooth), or as a Gaussian correlation structure (Table S2). Each of the GAM  
97 models represents a different approach to including spatial or temporal covariates, and there  
98 are different ways that these models propagate uncertainty into the future: uncertainty in the  
99 models with no time effects (GAM\_E, GAM\_S, GAM\_ES) is not affected by time; the tensor  
100 smooth in model GAM\_EST will extrapolate a time signal and tends to increase the prediction's  
101 standard errors over time; and the correlated errors in model GAM\_Ecor model do not  
102 propagate through time. Extrapolating a time pattern 90 years (as done in GAM\_EST) would  
103 generally be a risky decision, and an alternative is to make the time value constant by specifying  
104 a first-order penalty ( $m=1$ ) for that variable, although this may over-constrain the model.

105

106 GLMMs were fitted using the *sdmTMB* R package (version 0.0.19.90) (Anderson et al., in review;  
107 Anderson, 2019). These methods differ from the GAM approach above in that they implement

108 the Stochastic Partial Differential Equation (SPDE) method to estimate Gaussian random fields  
109 as Gaussian Markov random fields (Lindgren et al., 2011). As with the GAMs described above,  
110 spatial or spatiotemporal fields may be added to any GLMM model. Models estimated with the  
111 SPDE approach differ in that they also provide estimates of spatial covariance and derived  
112 quantities (spatial range). Four separate GLMMs were fitted for each species archetype, with  
113 parameterization options (Table S2) including: environmental covariates and constant spatial  
114 effects implemented via a spatial random field; constant and time-varying spatial effects  
115 implemented via a spatial random field and spatiotemporal random fields with temporal  
116 correlation following a first order autoregressive (AR1) process (Anderson, 2019);  
117 environmental covariates and spatially varying temporal trends implemented via spatial  
118 random fields for the intercept and slope (Barnett et al., 2021); and environmental covariates,  
119 constant and time-varying spatial effects implemented via a spatial random field and AR(1)  
120 spatiotemporal random fields. All environmental variables were included as quadratic terms to  
121 allow for non-linear responses. Like the GAMs above, each of these alternative model  
122 configurations propagates future uncertainty differently. The model with only environmental  
123 and spatial effects (GLMM\_ES) behaves similarly to the GAM\_E model in that uncertainty does  
124 not increase through time. The GLMMs with a spatiotemporal component (GLMM\_S,  
125 GLMM\_EST) have uncertainty increasing over time (as with GAM\_EST) because the  
126 spatiotemporal fields are modeled as AR(1). Model GLMM\_EST deals with time slightly  
127 differently, in that the trend is estimated as a spatially varying coefficient; with this model,  
128 uncertainty is similar to the GLMM\_ES or equivalent GAMs in that it is constant through time.

129  
130 BRTs were fitted using the *dismo* package (Elith et al., 2008), with a tree complexity of 3, bag  
131 fraction of 6, and a learning rate of 0.01 or 0.001 to ensure >1000 trees during the fitting  
132 process. Three BRTs were fit for each species archetype, with parameterization options (Table  
133 S2) including: environmental covariates only; environmental and spatial covariates; and  
134 environmental, spatial, and temporal covariates.

135  
136 MLPs were fitted using the *neuralnet* package (Fritsch et al., 2019) using the resilient  
137 backpropagation with weight backtracking algorithm and a logistic activation function. Three  
138 MLPs were fit for each species archetype, with parameterisation options (Table S2) including:  
139 environmental covariates only; environmental and spatial covariates; and environmental,  
140 spatial, and temporal covariates. MLPs used 3 neurons in the single hidden layer, and the  
141 threshold was adjusted between 0.2 and 0.5 to ensure convergence.

142  
143

144 **Supplemental References:**

145 Anderson, S. C. (2019). *A reproducible data synopsis for over 100 species of British Columbia*  
146 *groundfish*. Canadian Science Advisory Secretariat (CSAS).

147 Anderson, S., Ward, E., English, P., & Barnett, L. (in review). *SdmTMB: an R package for fast,*  
148 *flexible, and user-friendly generalized linear mixed effects models with spatial and*  
149 *spatiotemporal random fields*. <https://doi.org/10.1101/2022.03.24.485545>

150 Barnett, L. A. K., Ward, E. J., & Anderson, S. C. (2021). Improving estimates of species  
151 distribution change by incorporating local trends. *Ecography*, *44*(3), 427–439.  
152 <https://doi.org/10.1111/ecog.05176>

153 Elith, J., Leathwick, J. R., & Hastie, T. (2008). A working guide to boosted regression trees.  
154 *Journal of Animal Ecology*, *77*(4), 802–813.

155 Fritsch, S., Guenther, F., & Guenther, M. F. (2019). Package ‘neuralnet.’ *Training of Neural*  
156 *Networks*.

157 Haltuch, M. A., Johnson, K. F., Tolimieri, N., Kapur, M. S., & Castillo-Jordán, C. (2019). Status of  
158 the sablefish stock in US waters in 2019. *Pacific Fisheries Management Council, Portland,*  
159 *OR*.

160 Leeuwis, R. H. J., Nash, G. W., Sandrelli, R. M., Zanuzzo, F. S., & Gamperl, A. K. (2019). The  
161 environmental tolerances and metabolic physiology of sablefish (*Anoplopoma fimbria*).  
162 *Comparative Biochemistry and Physiology Part A: Molecular & Integrative Physiology*,  
163 *231*, 140–148. <https://doi.org/10.1016/j.cbpa.2019.02.004>

164 Leroy, B., Meynard, C. N., Bellard, C., & Courchamp, F. (2016). Virtualspecies, an R package to  
165 generate virtual species distributions. *Ecography*, *39*(6), 599–607.

166 Lindgren, F., Rue, H., & Lindström, J. (2011). An explicit link between Gaussian fields and  
167 Gaussian Markov random fields: The stochastic partial differential equation approach.  
168 *Journal of the Royal Statistical Society: Series B (Statistical Methodology)*, *73*(4), 423–  
169 498.

170 MacCall, A. D., Sydeman, W. J., Davison, P. C., & Thayer, J. A. (2016). Recent collapse of  
171 northern anchovy biomass off California. *Fisheries Research*, *175*, 87–94.

172 Meynard, C. N., Leroy, B., & Kaplan, D. M. (2019). Testing methods in species distribution  
173 modelling using virtual species: What have we learnt and what are we missing?  
174 *Ecography*.

175 Pinheiro, J., Bates, D., DebRoy, S., Sarkar, D., Heisterkamp, S., Van Willigen, B., & Maintainer, R.  
176 (2017). Package ‘nlme.’ *Linear and Nonlinear Mixed Effects Models, Version*, *3*(1).

177 Punt, A. E., MacCall, A. D., Essington, T. E., Francis, T. B., Hurtado-Ferro, F., Johnson, K. F.,  
178 Kaplan, I. C., Koehn, L. E., Levin, P. S., & Sydeman, W. J. (2016). Exploring the  
179 implications of the harvest control rule for Pacific sardine, accounting for predator  
180 dynamics: A MICE model. *Ecological Modelling*, *337*, 79–95.

181 Stierhoff, K. L., Zwolinski, J. P., & Demer, D. A. (2020). *Distribution, Biomass, and Demography of*  
182 *Coastal Pelagic Fishes in the California Current Ecosystem During Summer 2019 Based on*  
183 *Acoustic-Trawl Sampling*.

184 Wood, S. N. (2017). *Generalized additive models: An introduction with R*. CRC press.  
185  
186  
187

188 **Table S1** Variables used to simulate species spatially-explicit biomass and their parameter  
 189 values associated with a distribution. All variables define habitat suitability responses, except  
 190 for 'Biomass' which is the argument used to determine abundance when present, and  
 191 'Occurrence' which is the function used to convert habitat suitability to a presence-absence.  
 192 Three species archetypes are shown: Highly Migratory Species (HMS), Coastal Pelagic Species  
 193 (CPS), and Groundfish species (GFS).  
 194

| Species Archetype | Name                                  | Description                                          | Parameter 1       | Parameter 2            | Distribution |
|-------------------|---------------------------------------|------------------------------------------------------|-------------------|------------------------|--------------|
| HMS               | SST (°C)                              | Sea surface temperature                              | $\mu = 17$        | $\sigma = 4$           | normal       |
|                   | MLD (m)                               | Mixed layer depth                                    | $\mu = 50$        | $\sigma = 30$          | normal       |
|                   | Prey presence                         | Preference for prey                                  | $\alpha = -0.15$  | $\beta = 0.4$          | logistic     |
|                   | Prey SST (°C)                         | Prey sea surface temperature                         | $\mu = 14$        | $\sigma = 7$           | normal       |
|                   | Prey Zoo200 (mmol N m <sup>-2</sup> ) | Zooplankton integrated over top 200m                 | $\alpha = -10$    | $\beta = 45$           | logistic     |
|                   | Biomass (kg)                          | Biomass if species considered present in a grid cell | $\log \mu = 3.29$ | $\log (\sigma) = 0.26$ | Log normal   |
| CPS               | SST (°C)                              | Sea surface temperature                              | $\mu = 16$        | $\sigma = 6$           | Normal       |
|                   | Zoo50 (mmol N m <sup>-2</sup> )       | Zooplankton integrated over top 50m                  | $\alpha = -5$     | $\beta = 20$           | Logistic     |
|                   | Bathymetry (m)                        | Spatial covariate                                    | $\alpha = -500$   | $\beta = -2000$        | Logistic     |
|                   | Biomass (kg)                          | Biomass if species considered present in a grid cell | $\log \mu = 6.87$ | $\log (\sigma) = 0.14$ | Log normal   |
| GFS               | BT (°C)                               | Bottom temperature                                   | $\mu = 4$         | $\sigma = 3$           | Normal       |
|                   | BO (mmol m <sup>3</sup> )             | Bottom oxygen                                        | $\mu = 57$        | $\sigma = 62$          | Normal       |
|                   | Bathymetry (m)                        | Spatial covariate                                    | $\mu = 900$       | $\sigma = 1600$        | Normal       |
|                   | Biomass (kg)                          | Biomass if species considered present in a grid cell | $\log \mu = 5.14$ | $\log (\sigma) = 0.22$ | Log normal   |
| All species       | Occurrence (0 or 1)                   | Occurrence as a function of habitat suitability      | $\alpha = -0.7$   | $\beta = 0.4$          | Logistic     |

196 **Table S2** Summary of model configurations and parameterization in R syntax for an example  
 197 species archetype, highly migratory species (HMS). Environmental variables for the HMS  
 198 archetype include sea surface temperature (SST), surface chlorophyll-a (Chla), and mixed layer  
 199 depth (MLD). SDMs include boosted regression trees (BRT), multilayer perceptron (MLP),  
 200 generalized additive model (GAM), and generalized linear mixed model (GLMM). SDM  
 201 parameterization options include combinations of environmental (E), spatial (S), temporal  
 202 covariates (T)  
 203

| Model     | Description                                                                                          | R syntax                                                                                                                                                |
|-----------|------------------------------------------------------------------------------------------------------|---------------------------------------------------------------------------------------------------------------------------------------------------------|
| BRT_E     | Environmental covariates only                                                                        | gbm.x = SST, Chla, MLD                                                                                                                                  |
| BRT_ES    | Environmental and spatial covariates                                                                 | gbm.x = SST, Chla, MLD, lat, lon                                                                                                                        |
| BRT_EST   | Environmental, spatial, and temporal covariates                                                      | gbm.x = SST, Chla, MLD, lat, lon, year                                                                                                                  |
| MLP_E     | Environmental covariates only                                                                        | SST + Chla + MLD                                                                                                                                        |
| MLP_ES    | Environmental and spatial covariates                                                                 | SST + Chla + MLD + lat + lon                                                                                                                            |
| MLP_EST   | Environmental, spatial, and temporal covariates                                                      | SST + Chla + MLD + lat + lon + year                                                                                                                     |
| GAM_E     | Environmental covariates only                                                                        | s(SST) + s(Chla) + s(MLD)                                                                                                                               |
| GAM_S     | Spatial covariates only                                                                              | s(lat,lon)                                                                                                                                              |
| GAM_ES    | Environmental and spatial covariates                                                                 | s(SST) + s(Chla) + s(MLD) + s(lat,lon)                                                                                                                  |
| GAM_EST   | Environmental, spatial, and temporal covariates                                                      | s(SST) + s(Chla) + s(MLD) + te(lat,lon,year)                                                                                                            |
| GAM_Ecor  | Environmental covariates with additional residual spatiotemporal correlation                         | s(SST) + s(Chla) + s(MLD);<br>correlation=corGaus(form=~lat+lon fYear)                                                                                  |
| GLMM_ES   | Environmental covariates and a spatial random field                                                  | SST + Chla + MLD + SST <sup>2</sup> + Chla <sup>2</sup> + MLD <sup>2</sup> ; spatial = "on", spatiotemporal = "off"                                     |
| GLMM_ST   | Spatial and AR1 spatiotemporal random fields                                                         | spatial = "off", spatiotemporal = "AR1"                                                                                                                 |
| GLMM_EST  | Environmental covariates, and spatial and AR1 spatiotemporal random fields                           | SST + Chla + MLD + SST <sup>2</sup> + Chla <sup>2</sup> + MLD <sup>2</sup> ; spatial = "off", spatiotemporal = "AR1"                                    |
| GLMM_ESTt | Environmental covariates, a spatial random field, and spatially varying temporal trend random field. | SST + Chla + MLD + SST <sup>2</sup> + Chla <sup>2</sup> + MLD <sup>2</sup> ; spatial = "on",<br>spatiotemporal = "off",<br>spatial_varying = ~ 0 + year |

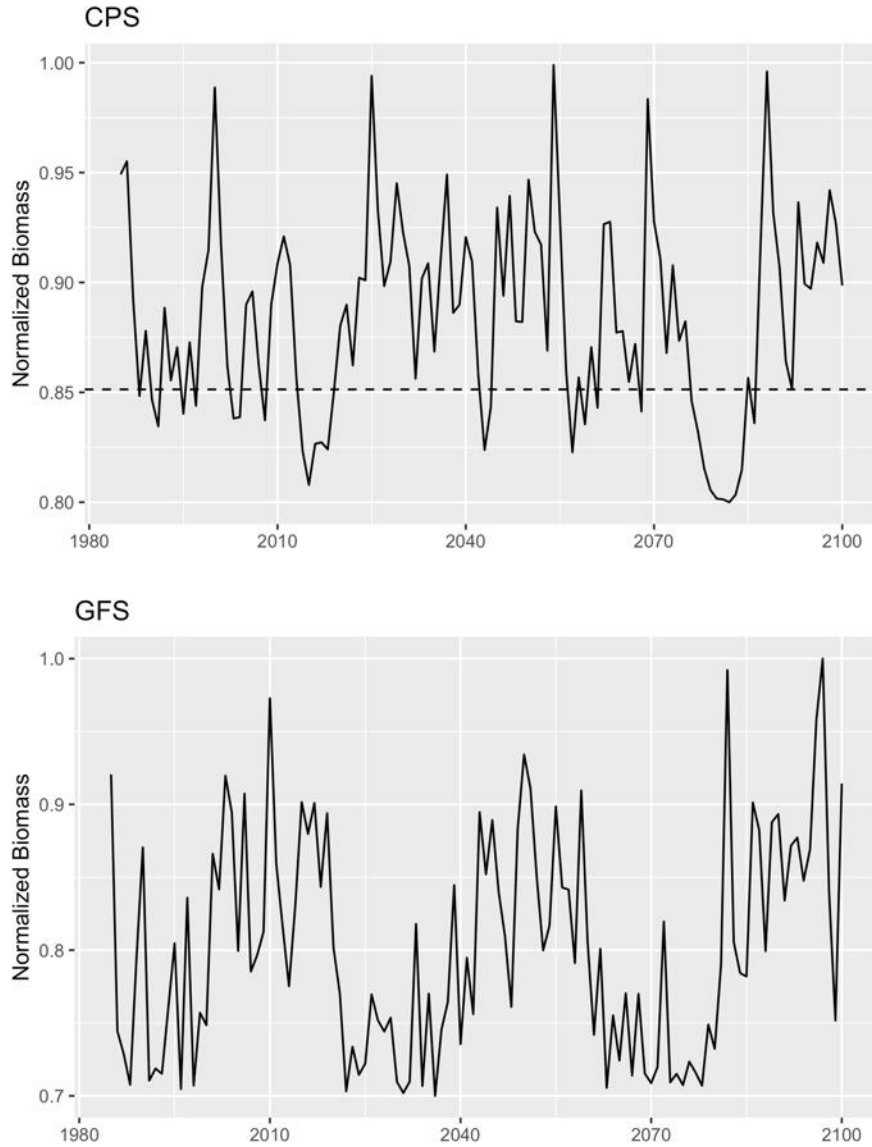

205

206 **Figure S1** Time-series of normalized biomass for CPS and GFS archetypes. Annual indices are  
 207 used as a biomass multiplier to encompass population trends in the species simulations. CPS  
 208 reflects boom-bust dynamics from a population model (Punt et al., 2016), and the dashed line  
 209 indicates the 25% quantile threshold used to force a preference of southern habitats when  
 210 biomass is low. GFS reflects 20-year phase shifts of recruitment which impacts total population  
 211 biomass.

212



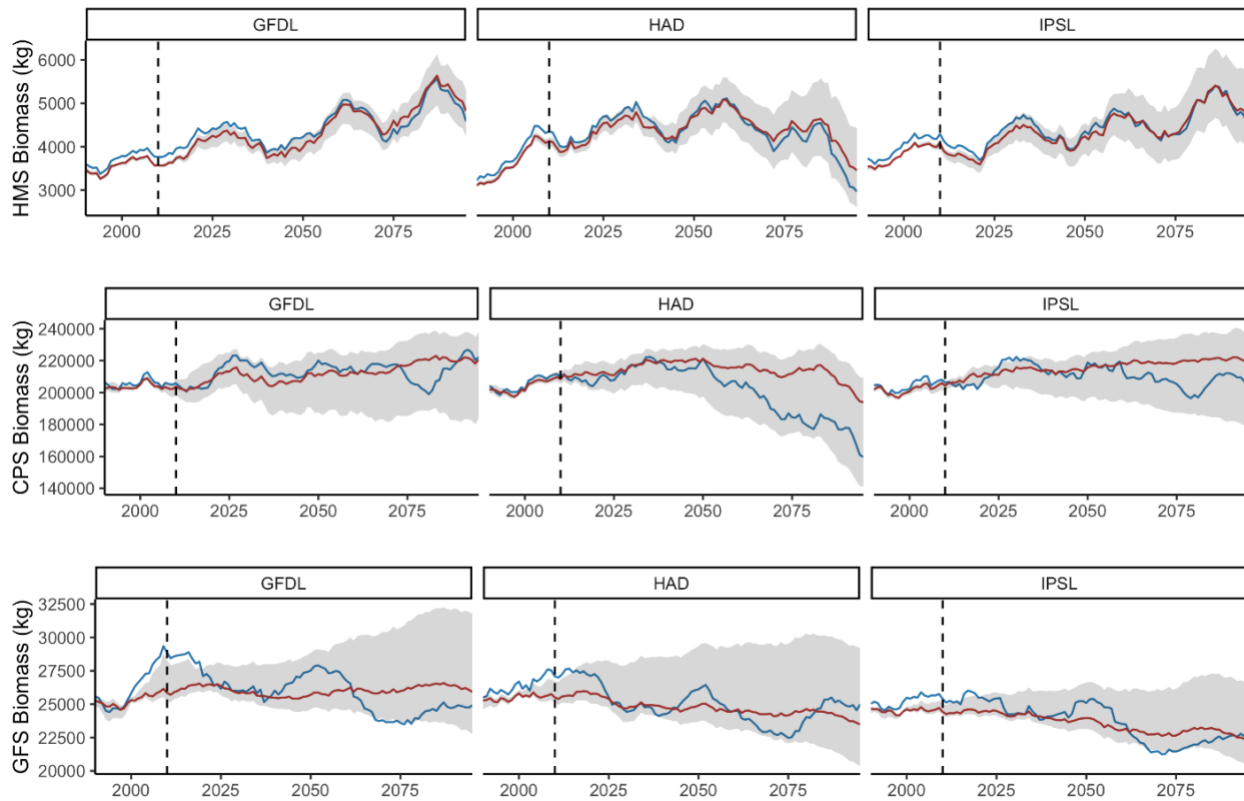

213

214 **Figure S2** Time-series of simulated (blue) and estimated (red) species biomass for each earth  
 215 system model. Red line indicates the ensemble mean, with gray shading showing the spread  
 216 across 12 species distribution models. An 11-year running mean is applied to the time-series.

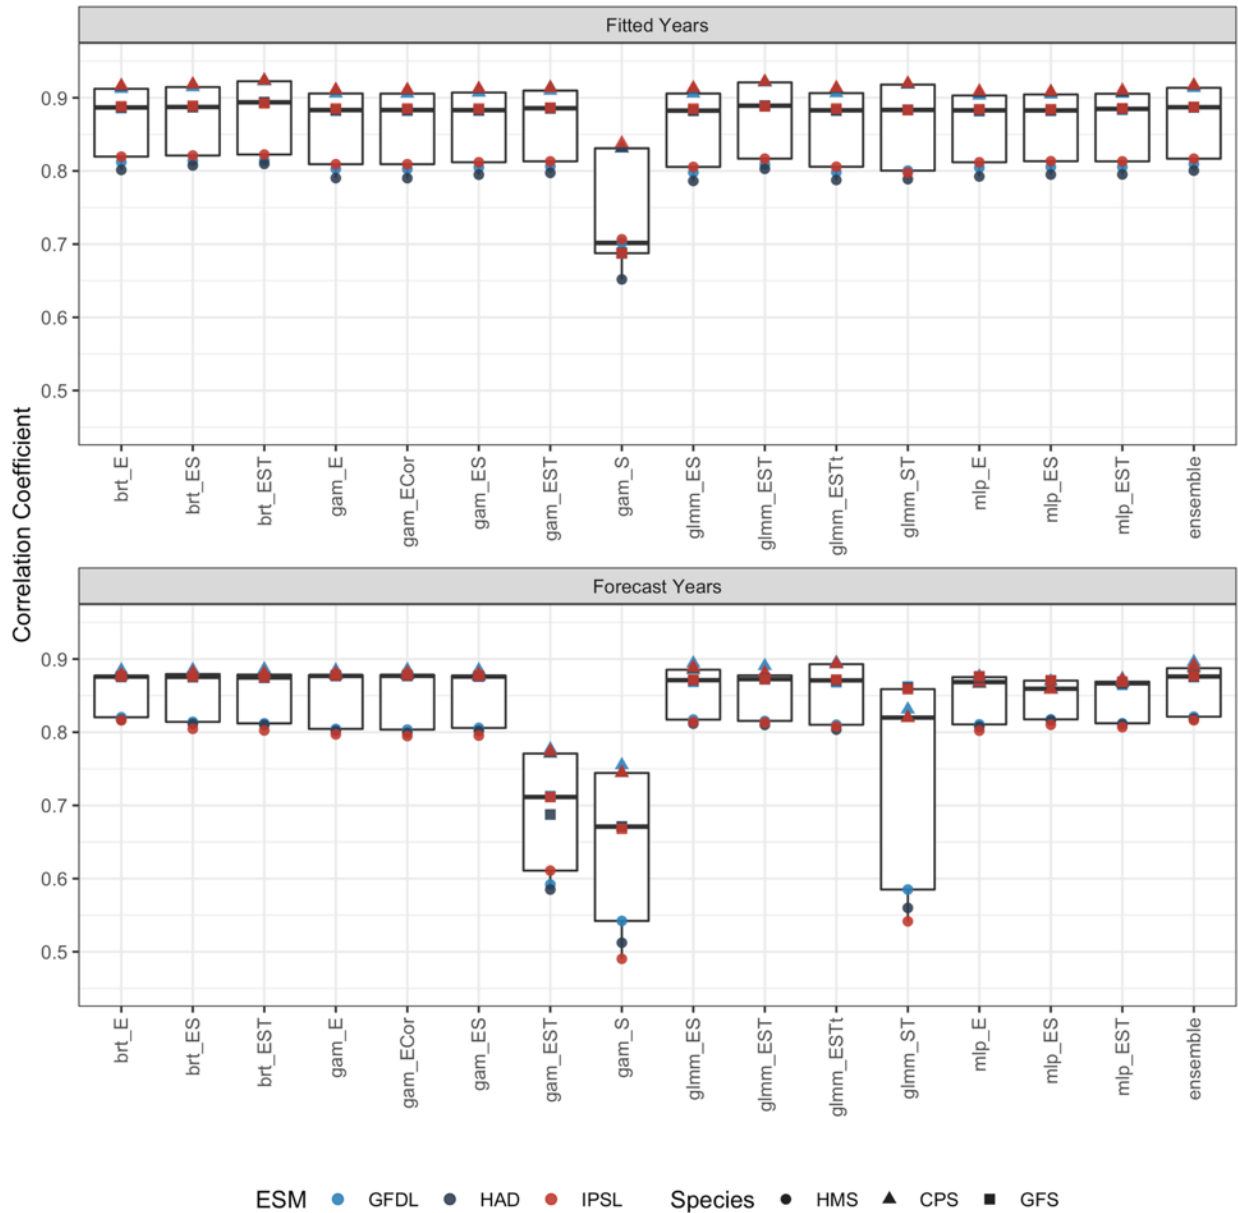

217

218 **Figure S3** Spearman correlation coefficient between simulated and estimated biomass for each  
 219 SDM on fitted data (top; 1985-2010) and forecast (bottom; 2011-2100) data. Results for each  
 220 species archetype (symbol) and earth system model (color), and the ensemble mean across  
 221 SDMs are shown.

222

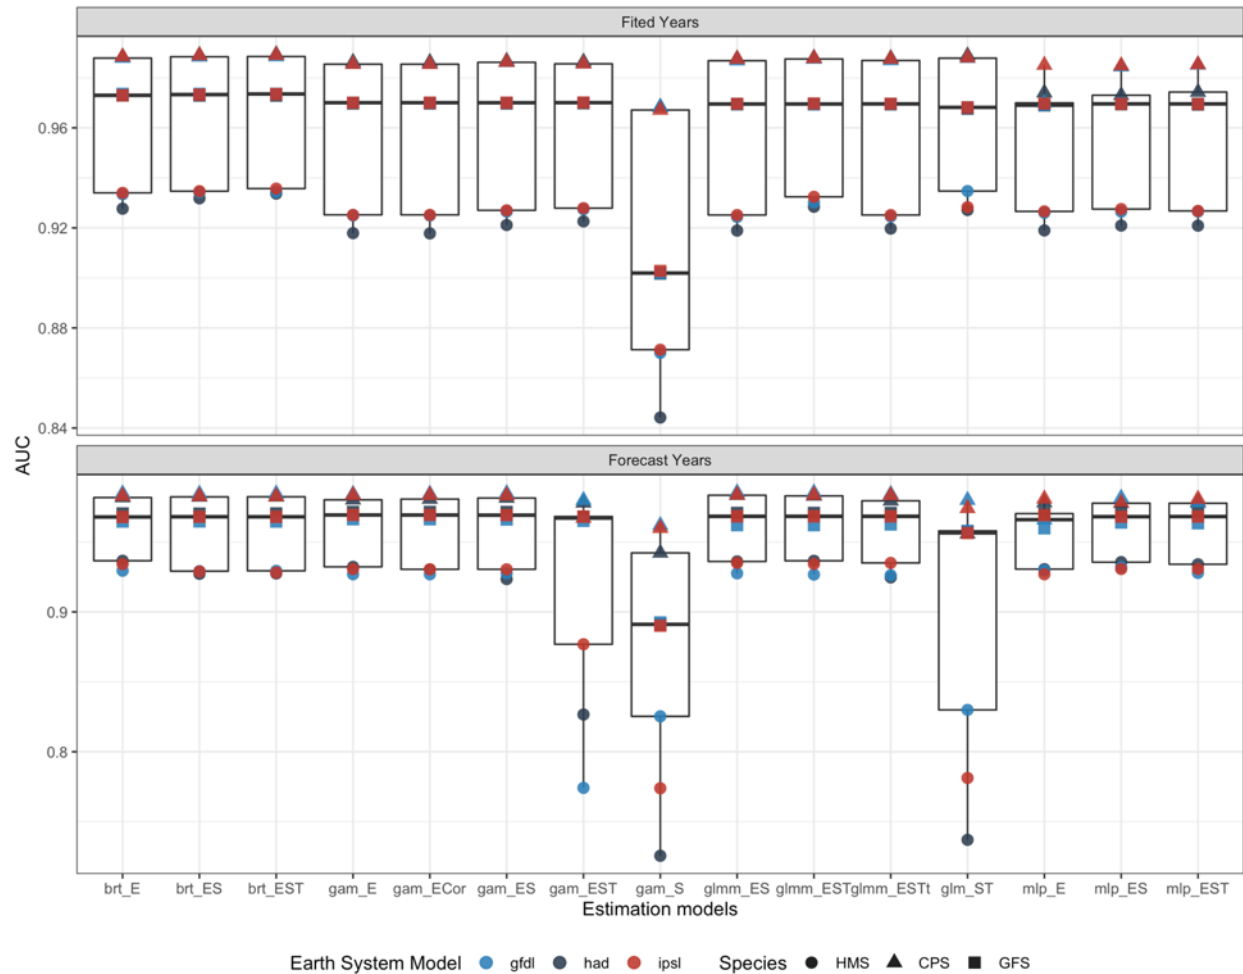

223

224

**Figure S4** Area under the receiver operating curve (AUC) between simulated and estimated habitat suitability for each SDM on fitted data (top; 1985-2010) and forecast (bottom; 2011-2100) data. Results for each species archetype (symbol) and earth system model (color) are shown.

225

226

227

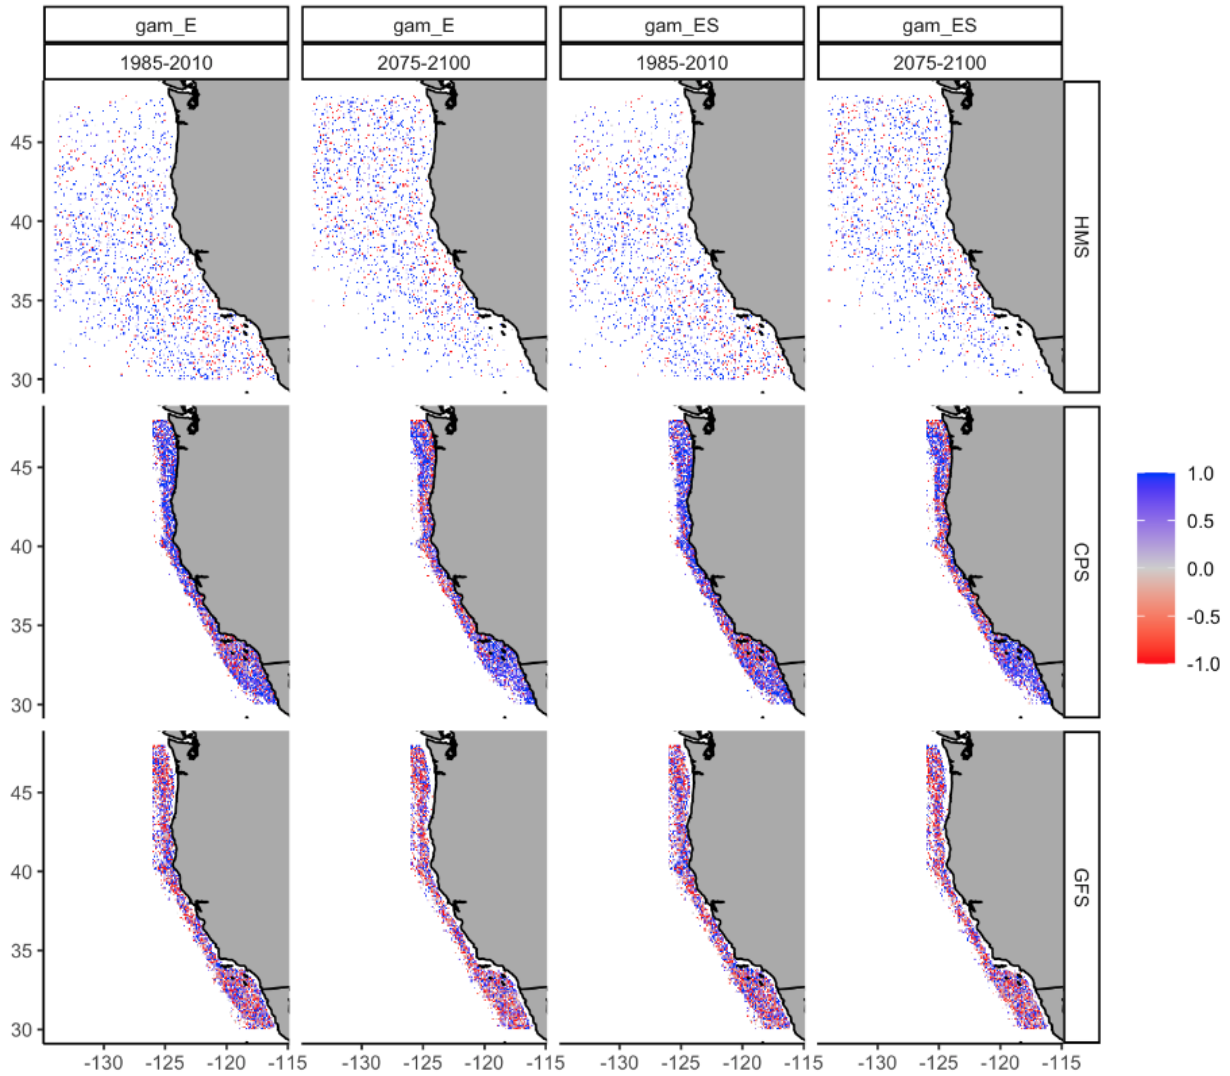

228

229 **Figure S5** Spatial correlation coefficients between simulated and estimated (GAM\_E and  
 230 GAM\_ES models) biomass for the three species archetypes, averaged across historical (1985-  
 231 2010) and future (2075-2100) periods. Results from the HAD earth system model are shown.

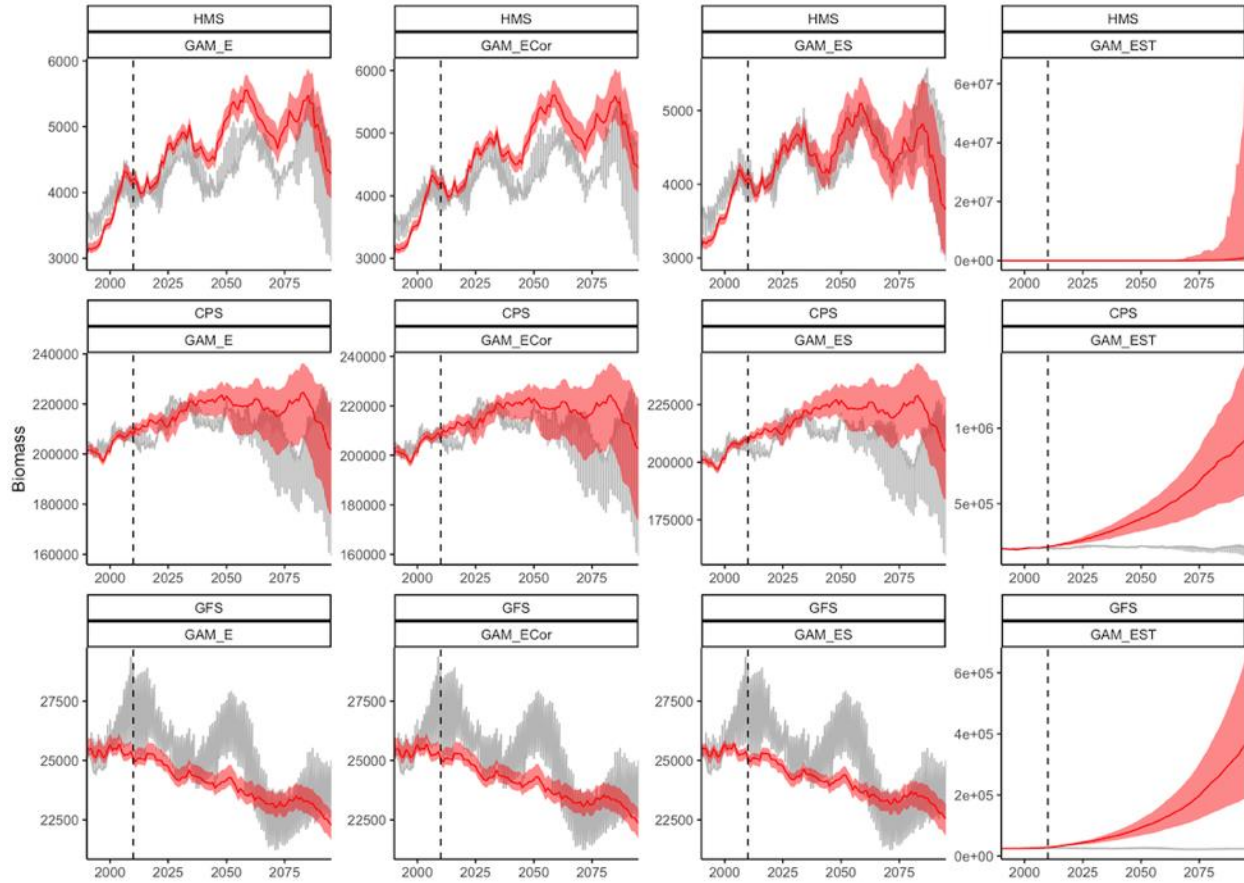

232  
 233 **Figure S6** Time-series of simulated (grey line) and estimated (red line) biomass for species  
 234 archetypes and the HAD earth system model. Within-model uncertainty for GAM SDMs  
 235 (GAM\_E; GAM\_ECor; GAM\_ES; GAM\_EST) was generated from 100 samples from the posterior  
 236 distribution of fitted models, with mean indicated by the red line and range of estimates  
 237 indicated by the red shading. An 11-year running mean was applied.

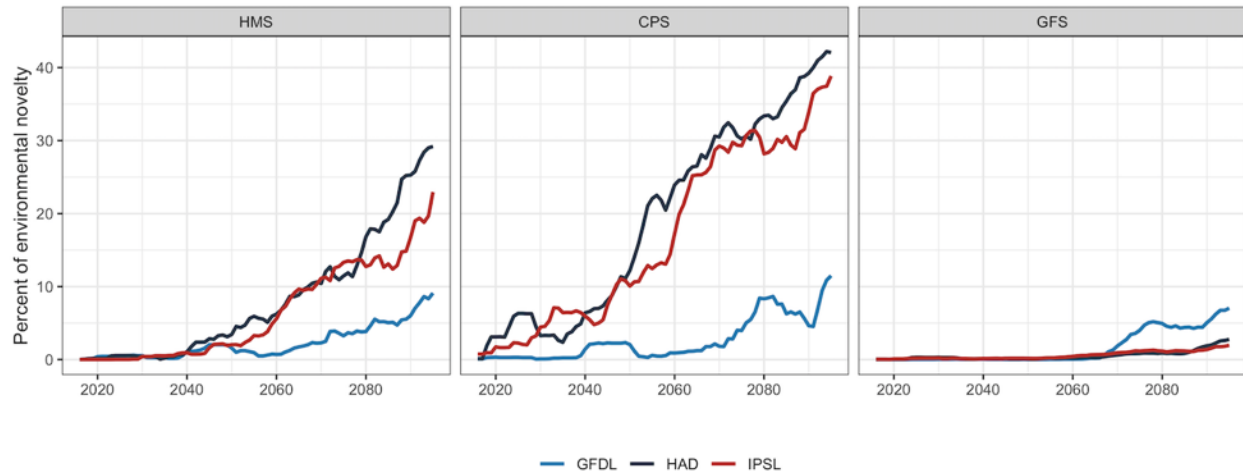

238

239 **Figure S7** Percent of environmental extrapolation experienced by SDMs, with novelty relative to  
 240 the 1985-2010 training period. An 11-year rolling mean was applied.

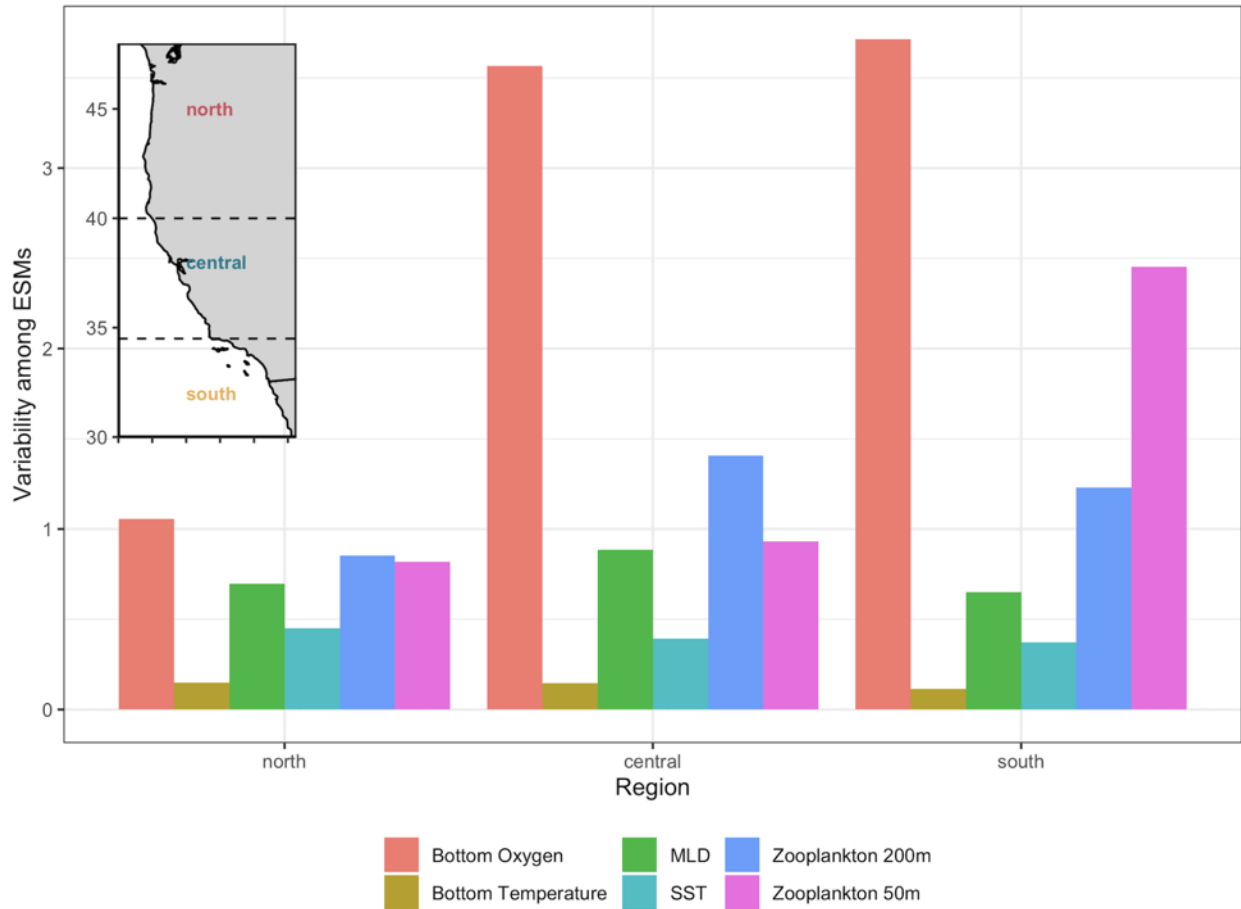

241

242 **Figure S8** Variation among environmental variables for three earth system models (ESMs),  
 243 shown for three regions in the California Current System. Note that variability among ESMs is  
 244 lower in northern regions for most variables.
